# Supplementary material
Source: publisher figshare collection journal article supplement (https://acs.figshare.com/ndownloader/files/13197341)

# Peptide sequence: LAAPQSYPTWPGSGR

## Spectrum from SRMatlas

LAAPQSYPTWPGSGR, MH+ 1686.8598, m/z 843.9336

File: HSRMA\_QTOF\_BASE, Scan: 1, Exp. m/z: 843.934, Charge: 2

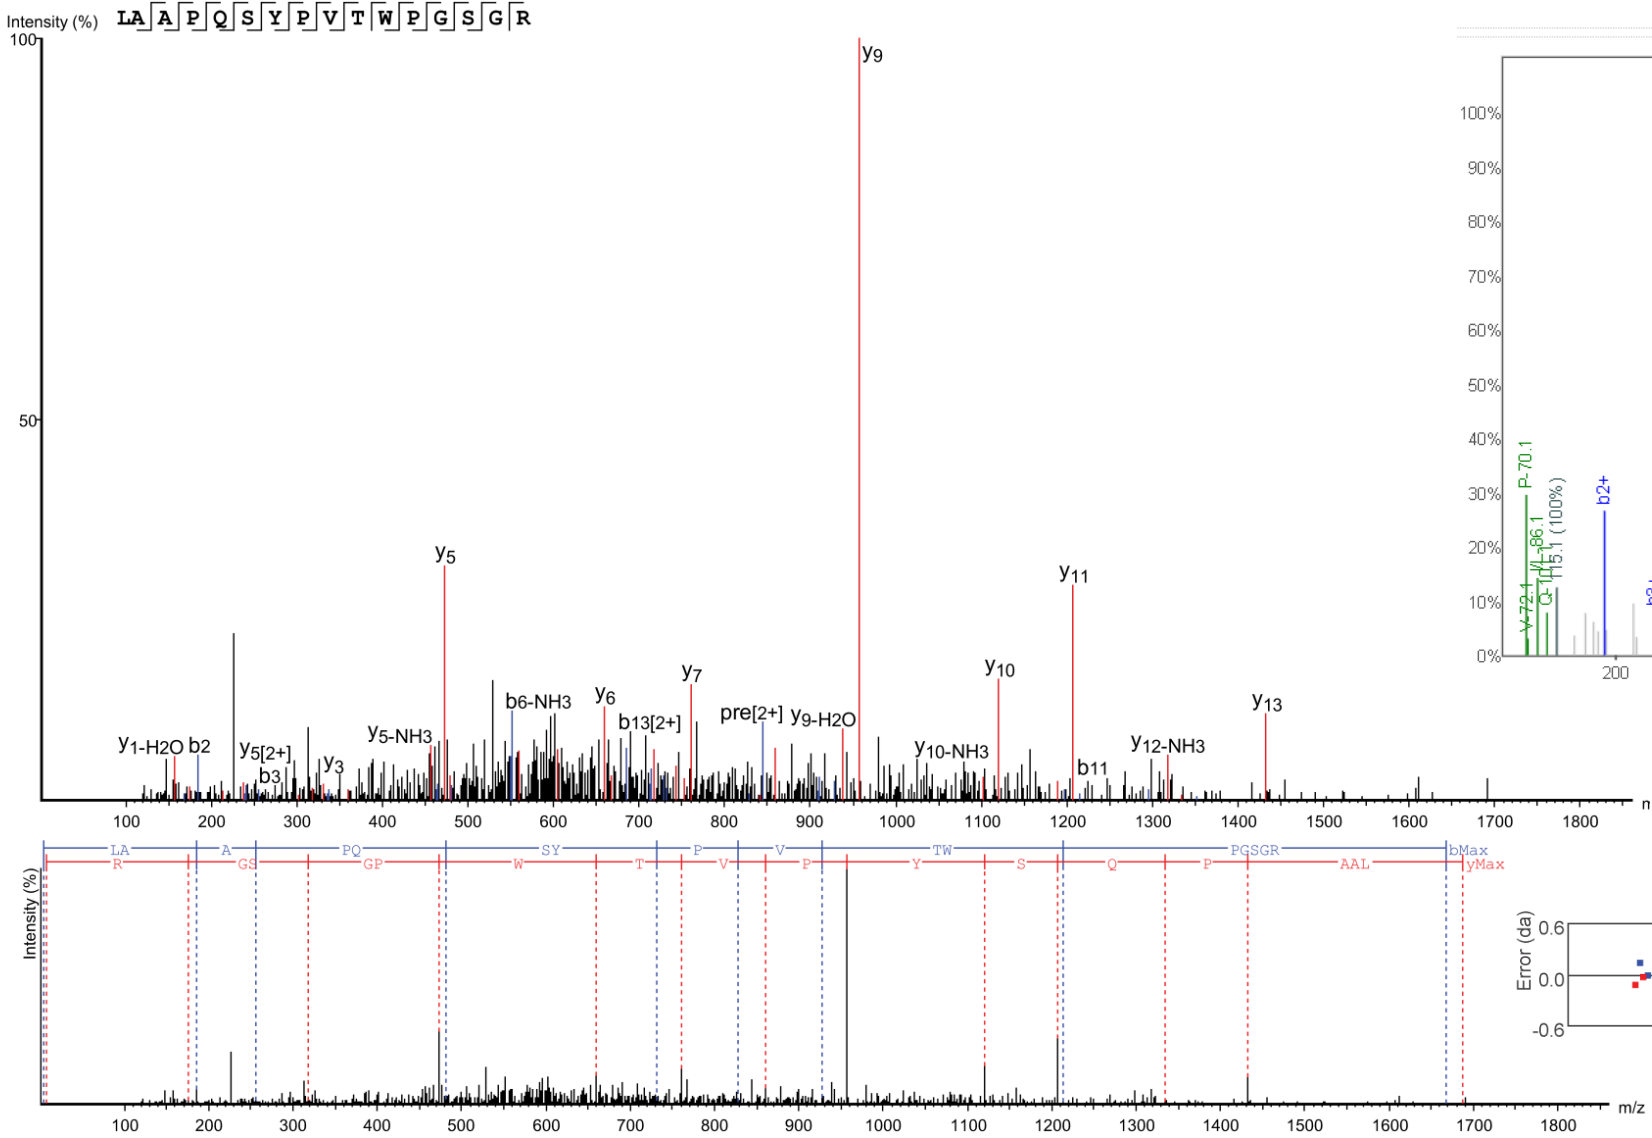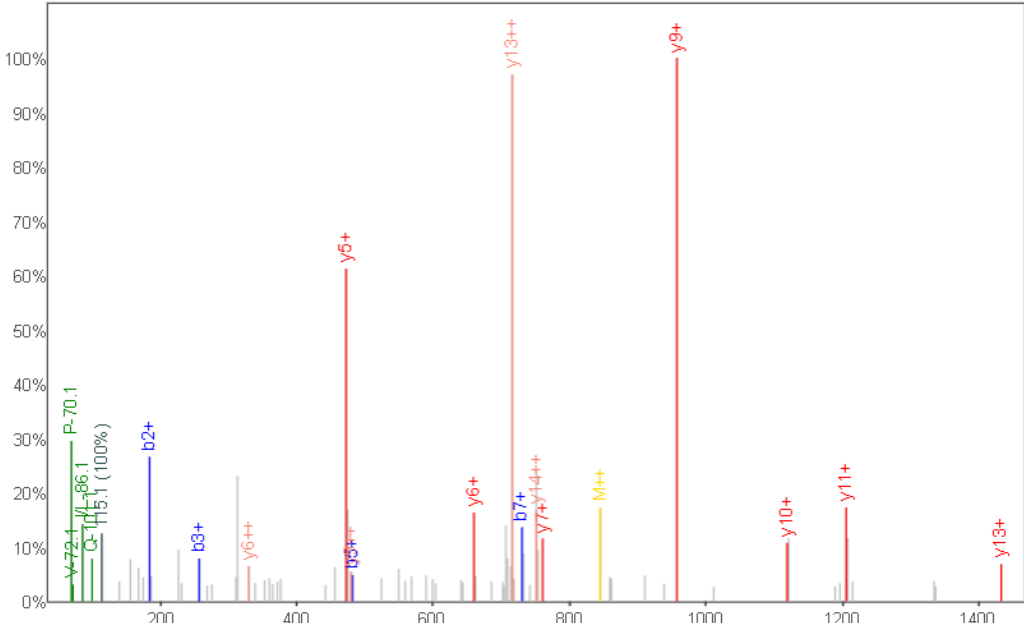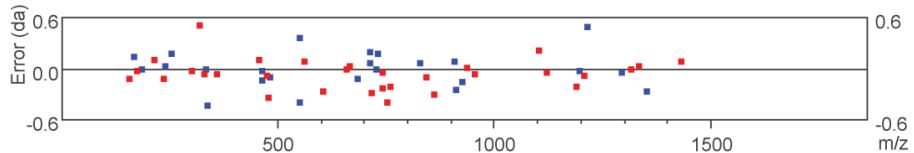

Supplement: Supplementary file 1 [file 13197341]
